# Supplementary material for: Evolution of Gaseous and Particulate Pollutants in the Air: What Changed after Five Lockdown Weeks at a Southwest Atlantic European Region (Northwest of Spain) Due to the SARS-CoV-2 Pandemic?
Source: MDPI journal article supplement (doi:10.3390/atmos12050562), 2021-04-27

## Supporting Information

### **Evolution of gaseous and particulate pollutants in the air: What changed after five lockdown weeks at a Southwest Atlantic European region (Northwest of Spain) due to the SARS-CoV-2 Pandemic?**

Jorge Moreda-Piñeiro<sup>1\*</sup>, Joel Sánchez-Piñero<sup>1</sup>, María Fernández-Amado<sup>1</sup>, Paula Costa-Tomé<sup>2</sup>, Nuria Gallego-Fernández<sup>2</sup>, María Piñeiro-Iglesias<sup>1</sup>, Purificación López-Mahía<sup>1</sup>, Soledad Muniategui-Lorenzo<sup>1</sup>

*(1) University of A Coruña. Grupo Química Analítica Aplicada (QANAP), Instituto Universitario de Medio Ambiente (IUMA), Centro de Investigaciones Científicas Avanzadas (CICA), Department of Chemistry. Faculty of Sciences. Campus de A Coruña, s/n. 15071 – A Coruña. Spain.*

*(2) Rede de Calidade do Aire de Galicia, MeteoGalicia, Subdirección Xeral de Meteoroloxía e Cambio Climático, Dirección Xeral de Calidade Ambiental e Cambio Climático, Consellería de Medio Ambiente, Territorio e Vivenda, Xunta de Galicia.*

<sup>\*</sup>Corresponding author: *Phone number: +34 981 167000, Fax number: +34 981 167065, E-mail address: jorge.moreda@udc.es*

**Table S1.** Meteorological conditions (average $\pm$ SD values) before and during the lockdown period at A Coruña and Vigo cities.

| <i>Temperature (°C)</i>                   |                                                                     |                                                               |                  |         |
|-------------------------------------------|---------------------------------------------------------------------|---------------------------------------------------------------|------------------|---------|
|                                           | Pre-lockdown<br>(February 7 <sup>th</sup> -March 13 <sup>th</sup> ) | Lockdown<br>(March 14 <sup>th</sup> -April 20 <sup>th</sup> ) | Variation<br>(%) | p-value |
| A Coruña                                  | 12.8 $\pm$ 2.8                                                      | 13.2 $\pm$ 3.6                                                | +3               | 0.024   |
| Vigo                                      | 10.4 $\pm$ 2.5                                                      | 11.1 $\pm$ 3.1                                                | +7               | <0.001  |
| <i>Relative humidity (%)</i>              |                                                                     |                                                               |                  |         |
|                                           | Pre-lockdown<br>(February 7 <sup>th</sup> -March 13 <sup>th</sup> ) | Lockdown<br>(March 14 <sup>th</sup> -April 20 <sup>th</sup> ) | Variation<br>(%) | p-value |
| A Coruña                                  | 78 $\pm$ 10                                                         | 77 $\pm$ 13                                                   | -1               | 0.354   |
| Vigo                                      | 85 $\pm$ 15                                                         | 81 $\pm$ 16                                                   | -5               | <0.001  |
| <i>Atmospheric pressure (hPa)</i>         |                                                                     |                                                               |                  |         |
|                                           | Pre-lockdown<br>(February 7 <sup>th</sup> -March 13 <sup>th</sup> ) | Lockdown<br>(March 14 <sup>th</sup> -April 20 <sup>th</sup> ) | Variation<br>(%) | p-value |
| A Coruña                                  | 1016 $\pm$ 7                                                        | 1008 $\pm$ 5                                                  | -1               | <0.001  |
| Vigo                                      | 971 $\pm$ 6                                                         | 962 $\pm$ 5                                                   | -1               | <0.001  |
| <i>Wind speed (m s<sup>-1</sup>)</i>      |                                                                     |                                                               |                  |         |
|                                           | Pre-lockdown<br>(February 7 <sup>th</sup> -March 13 <sup>th</sup> ) | Lockdown<br>(March 14 <sup>th</sup> -April 20 <sup>th</sup> ) | Variation<br>(%) | p-value |
| A Coruña                                  | 0.70 $\pm$ 0.77                                                     | 0.39 $\pm$ 0.25                                               | -44              | <0.001  |
| Vigo                                      | 2.4 $\pm$ 1.9                                                       | 2.4 $\pm$ 1.7                                                 | 0                | 0.820   |
| <i>Rainfall (mm)</i>                      |                                                                     |                                                               |                  |         |
|                                           | Pre-lockdown<br>(February 7 <sup>th</sup> -March 13 <sup>th</sup> ) | Lockdown<br>(March 14 <sup>th</sup> -April 20 <sup>th</sup> ) | Variation<br>(%) | p-value |
| A Coruña                                  | 0.69 $\pm$ 2.9                                                      | 0.61 $\pm$ 2.5                                                | -12              | 0.547   |
| Vigo                                      | 0.27 $\pm$ 0.92                                                     | 0.20 $\pm$ 0.75                                               | -26              | 0.062   |
| <i>Solar radiation (W m<sup>-2</sup>)</i> |                                                                     |                                                               |                  |         |
|                                           | Pre-lockdown<br>(February 7 <sup>th</sup> -March 13 <sup>th</sup> ) | Lockdown<br>(March 14 <sup>th</sup> -April 20 <sup>th</sup> ) | Variation<br>(%) | p-value |
| A Coruña                                  | 99 $\pm$ 154                                                        | 129 $\pm$ 217                                                 | +30              | 0.001   |
| Vigo                                      | 123 $\pm$ 198                                                       | 180 $\pm$ 258                                                 | +46              | <0.001  |

**Table S2.** Average $\pm$ SD ( $\mu\text{g m}^{-3}$ , except for CO:  $\text{mg m}^{-3}$ ) values of pollutants during the lockdown stages I and II at studied stations.

| NO              |                                                              |                                                              |         | NO <sub>2</sub>                                              |                                                              |         |
|-----------------|--------------------------------------------------------------|--------------------------------------------------------------|---------|--------------------------------------------------------------|--------------------------------------------------------------|---------|
| Station code    | Lockdown I (March 14 <sup>th</sup> -March 29 <sup>th</sup> ) | Lockdown II (March 30 <sup>th</sup> -April 9 <sup>th</sup> ) | p-value | Lockdown I (March 14 <sup>th</sup> -March 29 <sup>th</sup> ) | Lockdown II (March 30 <sup>th</sup> -April 9 <sup>th</sup> ) | p-value |
| AC-T            | 1.8 $\pm$ 0.81                                               | 1.8 $\pm$ 0.88                                               | 0.9456  | 8.1 $\pm$ 4.6                                                | 7.7 $\pm$ 5.5                                                | 0.8345  |
| AC-L            | 0.21 $\pm$ 0.19                                              | 0.14 $\pm$ 0.09                                              | 0.1710  | 2.2 $\pm$ 1.7                                                | 0.91 $\pm$ 1.0                                               | 0.0298  |
| V-C             | 2.8 $\pm$ 1.7                                                | 1.9 $\pm$ 0.59                                               | 0.0620  | 15.5 $\pm$ 5.3                                               | 12.3 $\pm$ 4.5                                               | 0.1115  |
| V-L             | 6.0 $\pm$ 2.5                                                | 4.2 $\pm$ 0.82                                               | 0.0150  | 6.5 $\pm$ 4.4                                                | 4.0 $\pm$ 2.5                                                | 0.1147  |
| AC-G            | 5.1 $\pm$ 4.4                                                | 5.7 $\pm$ 4.1                                                | 0.6926  | 21.0 $\pm$ 8.2                                               | 21.4 $\pm$ 9.1                                               | 0.9033  |
| V-PSAE          | 2.7 $\pm$ 0.87                                               | 2.3 $\pm$ 0.40                                               | 0.0760  | 12.7 $\pm$ 4.7                                               | 9.1 $\pm$ 3.4                                                | 0.0460  |
| V-PSAW          | 3.4 $\pm$ 2.4                                                | 2.1 $\pm$ 0.23                                               | 0.0400  | 12.0 $\pm$ 7.3                                               | 6.3 $\pm$ 2.9                                                | 0.0100  |
| NO <sub>x</sub> |                                                              |                                                              |         | SO <sub>2</sub>                                              |                                                              |         |
| Station code    | Lockdown I (March 14 <sup>th</sup> -March 29 <sup>th</sup> ) | Lockdown II (March 30 <sup>th</sup> -April 9 <sup>th</sup> ) | p-value | Lockdown I (March 14 <sup>th</sup> -March 29 <sup>th</sup> ) | Lockdown II (March 30 <sup>th</sup> -April 9 <sup>th</sup> ) | p-value |
| AC-T            | 10.3 $\pm$ 5.9                                               | 10.1 $\pm$ 6.8                                               | 0.9422  | 1.3 $\pm$ 0.29                                               | 1.4 $\pm$ 0.35                                               | 0.2615  |
| AC-L            | 2.4 $\pm$ 1.8                                                | 1.0 $\pm$ 1.1                                                | 0.0325  | 1.7 $\pm$ 1.2                                                | 1.1 $\pm$ 0.27                                               | 0.0430  |
| V-C             | 19.9 $\pm$ 7.7                                               | 15.3 $\pm$ 5.3                                               | 0.0989  | 5.7 $\pm$ 2.2                                                | 5.3 $\pm$ 2.0                                                | 0.6582  |
| V-L             | 14.2 $\pm$ 8.5                                               | 8.8 $\pm$ 4.2                                                | 0.0410  | 3.0 $\pm$ 0.80                                               | 2.8 $\pm$ 1.1                                                | 0.6042  |
| AC-G            | 25.9 $\pm$ 12.2                                              | 27.1 $\pm$ 12.7                                              | 0.8083  | 2.8 $\pm$ 2.0                                                | 2.1 $\pm$ 1.3                                                | 0.3865  |
| V-PSAE          | 14.9 $\pm$ 6.4                                               | 10.1 $\pm$ 4.7                                               | 0.0468  | 3.0 $\pm$ 0.09                                               | 3.0 $\pm$ 0.01                                               | 0.3929  |
| V-PSAW          | 15.3 $\pm$ 11.3                                              | 6.8 $\pm$ 3.4                                                | 0.0110  | 3.2 $\pm$ 0.23                                               | 3.0 $\pm$ 0.03                                               | 0.0400  |
| CO              |                                                              |                                                              |         | O <sub>3</sub>                                               |                                                              |         |
| Station code    | Lockdown I (March 14 <sup>th</sup> -March 29 <sup>th</sup> ) | Lockdown II (March 30 <sup>th</sup> -April 9 <sup>th</sup> ) | p-value | Lockdown I (March 14 <sup>th</sup> -March 29 <sup>th</sup> ) | Lockdown II (March 30 <sup>th</sup> -April 9 <sup>th</sup> ) | p-value |
| AC-T            | 0.31 $\pm$ 0.11                                              | 0.32 $\pm$ 0.07                                              | 0.6720  | 84.6 $\pm$ 12.3                                              | 77.1 $\pm$ 16.9                                              | 0.1943  |
| AC-L            | -a                                                           | -a                                                           |         | 83.2 $\pm$ 14.2                                              | 78.3 $\pm$ 14.7                                              | 0.3919  |
| V-C             | 0.10 $\pm$ 0.01                                              | 0.11 $\pm$ 0.01                                              | 0.1670  | 74.3 $\pm$ 12.5                                              | 69.6 $\pm$ 15.4                                              | 0.3998  |
| V-L             | 0.19 $\pm$ 0.09                                              | 0.15 $\pm$ 0.06                                              | 0.3210  | 68.3 $\pm$ 13.1                                              | 64.7 $\pm$ 18.4                                              | 0.5685  |
| AC-G            | -a                                                           | -a                                                           |         | -a                                                           | -a                                                           |         |
| V-PSAE          | -a                                                           | -a                                                           |         | -a                                                           | -a                                                           |         |
| V-PSAW          | -a                                                           | -a                                                           |         | 76.9 $\pm$ 12.4                                              | 73.3 $\pm$ 13.0                                              | 0.4749  |

| PM <sub>10</sub>          |                                                               |                                                              |                                                              | PM <sub>2.5</sub>                                            |                                                              |         |
|---------------------------|---------------------------------------------------------------|--------------------------------------------------------------|--------------------------------------------------------------|--------------------------------------------------------------|--------------------------------------------------------------|---------|
| Station code              | Lockdown I (March 14 <sup>th</sup> -March 29 <sup>th</sup> )  | Lockdown II (March 30 <sup>th</sup> -April 9 <sup>th</sup> ) | p-value                                                      | Lockdown I (March 14 <sup>th</sup> -March 29 <sup>th</sup> ) | Lockdown II (March 30 <sup>th</sup> -April 9 <sup>th</sup> ) | p-value |
| AC-T                      | 48.0 ±15.1                                                    | 32.6±12.5                                                    | 0.0102                                                       | 19.2±5.4                                                     | 12.8±3.9                                                     | 0.0023  |
| AC-L                      | 24.9±7.8                                                      | 16.2±7.4                                                     | 0.0078                                                       | –a                                                           | –a                                                           |         |
| V-C                       | 20.6±6.1                                                      | 12.9±3.5                                                     | 0.0009                                                       | 11.9±3.8                                                     | 7.0±2.4                                                      | 0.0008  |
| V-L                       | 22.5±6.1                                                      | 13.8±4.0                                                     | 0.0005                                                       |                                                              |                                                              |         |
| AC-G                      | 21.6±5.8                                                      | 14.7±3.8                                                     | 0.0019                                                       | 13.5±4.2                                                     | 8.9±2.1                                                      | 0.0010  |
| V-PSAE                    | –a                                                            | –a                                                           |                                                              | 13.6±3.5                                                     | 8.2±2.5                                                      | 0.0002  |
| V-PSAW                    | 24.3±7.1                                                      | 15.1±4.9                                                     | 0.0010                                                       | –a                                                           | –a                                                           |         |
| eBC <sub>T</sub>          |                                                               |                                                              |                                                              | eBC <sub>F</sub>                                             |                                                              |         |
| Station code              | Lockdown I (March 14 <sup>th</sup> -March 29 <sup>th</sup> )  | Lockdown II (March 30 <sup>th</sup> -April 9 <sup>th</sup> ) | p-value                                                      | Lockdown I (March 14 <sup>th</sup> -March 29 <sup>th</sup> ) | Lockdown II (March 30 <sup>th</sup> -April 9 <sup>th</sup> ) | p-value |
| AC-T                      | –a                                                            | –a                                                           |                                                              | –a                                                           | –a                                                           |         |
| AC-L                      | 0.61±0.21                                                     | 0.40±0.19                                                    | 0.0125                                                       | 0.33±0.13                                                    | 0.20±0.12                                                    | 0.0121  |
| V-C                       | 1.0±0.37                                                      | 0.65±0.25                                                    | 0.0056                                                       | 0.51±0.20                                                    | 0.40±0.19                                                    | 0.1713  |
| V-L                       | –a                                                            | –a                                                           |                                                              | –a                                                           | –a                                                           |         |
| AC-G                      | –a                                                            | –a                                                           |                                                              | –a                                                           | –a                                                           |         |
| V-PSAE                    | –a                                                            | –a                                                           |                                                              | –a                                                           | –a                                                           |         |
| V-PSAW                    | –a                                                            | –a                                                           |                                                              | –a                                                           | –a                                                           |         |
| eBC <sub>B</sub>          |                                                               |                                                              |                                                              |                                                              |                                                              |         |
| Station Code              | Lockdown I (March 14 <sup>th</sup> - March 29 <sup>th</sup> ) |                                                              | Lockdown II (March 30 <sup>th</sup> -April 9 <sup>th</sup> ) |                                                              | p-value                                                      |         |
| AC-T                      | –a                                                            |                                                              | –a                                                           |                                                              |                                                              |         |
| AC-L                      | 0.38±0.16                                                     |                                                              | 0.26±0.12                                                    |                                                              | 0.0414                                                       |         |
| V-C                       | 0.63±0.26                                                     |                                                              | 0.32±0.15                                                    |                                                              | 0.0015                                                       |         |
| V-L                       | –a                                                            |                                                              | –a                                                           |                                                              |                                                              |         |
| AC-G                      | –a                                                            |                                                              | –a                                                           |                                                              |                                                              |         |
| V-PSAE                    | –a                                                            |                                                              | –a                                                           |                                                              |                                                              |         |
| V-PSAW                    | –a                                                            |                                                              | –a                                                           |                                                              |                                                              |         |
| –a Pollutant not measured |                                                               |                                                              |                                                              |                                                              |                                                              |         |

**Table S3.** Average $\pm$ SD ( $\mu\text{g m}^{-3}$ , except for CO:  $\text{mg m}^{-3}$ ) values of pollutants during the lockdown stages II and III at studied stations.

| NO               |                                                              |                                                                |         | NO <sub>2</sub>                                              |                                                                |         |
|------------------|--------------------------------------------------------------|----------------------------------------------------------------|---------|--------------------------------------------------------------|----------------------------------------------------------------|---------|
| Station code     | Lockdown II (March 30 <sup>th</sup> -April 9 <sup>th</sup> ) | Lockdown III (April 10 <sup>th</sup> -April 20 <sup>th</sup> ) | p-value | Lockdown II (March 30 <sup>th</sup> -April 9 <sup>th</sup> ) | Lockdown III (April 10 <sup>th</sup> -April 20 <sup>th</sup> ) | p-value |
| AC-T             | 1.8 $\pm$ 0.88                                               | 1.6 $\pm$ 0.65                                                 | 0.5517  | 7.7 $\pm$ 5.5                                                | 7.1 $\pm$ 3.6                                                  | 0.7687  |
| AC-L             | 0.14 $\pm$ 0.09                                              | 0.14 $\pm$ 0.03                                                | 0.9420  | 0.91 $\pm$ 1.0                                               | 0.61 $\pm$ 0.84                                                | 0.4615  |
| V-C              | 1.9 $\pm$ 0.59                                               | 1.9 $\pm$ 1.1                                                  | 0.9652  | 12.3 $\pm$ 4.5                                               | 9.0 $\pm$ 4.9                                                  | 0.1223  |
| V-L              | 4.2 $\pm$ 0.82                                               | 3.5 $\pm$ 0.8                                                  | 0.0509  | 4.0 $\pm$ 2.5                                                | 3.3 $\pm$ 2.0                                                  | 0.4941  |
| AC-G             | 5.7 $\pm$ 4.1                                                | 4.4 $\pm$ 2.4                                                  | 0.3614  | 21.4 $\pm$ 9.1                                               | 18.3 $\pm$ 6.3                                                 | 0.3725  |
| V-PSAE           | 2.3 $\pm$ 0.40                                               | 2.2 $\pm$ 0.32                                                 | 0.6904  | 9.1 $\pm$ 3.9                                                | 6.6 $\pm$ 3.4                                                  | 0.1167  |
| V-PSAW           | 2.1 $\pm$ 0.23                                               | 2.2 $\pm$ 0.59                                                 | 0.6539  | 6.3 $\pm$ 2.9                                                | 4.9 $\pm$ 2.8                                                  | 0.2505  |
| NO <sub>x</sub>  |                                                              |                                                                |         | SO <sub>2</sub>                                              |                                                                |         |
| Station code     | Lockdown II (March 30 <sup>th</sup> -April 9 <sup>th</sup> ) | Lockdown III (April 10 <sup>th</sup> -April 20 <sup>th</sup> ) | p-value | Lockdown II (March 30 <sup>th</sup> -April 9 <sup>th</sup> ) | Lockdown III (April 10 <sup>th</sup> -April 20 <sup>th</sup> ) | p-value |
| AC-T             | 10.1 $\pm$ 6.8                                               | 9.2 $\pm$ 4.7                                                  | 0.7175  | 1.4 $\pm$ 0.35                                               | 1.1 $\pm$ 0.13                                                 | 0.0129  |
| AC-L             | 1.0 $\pm$ 1.1                                                | 0.72 $\pm$ 0.86                                                | 0.4796  | 1.1 $\pm$ 0.27                                               | 1.7 $\pm$ 1.2                                                  | 0.1193  |
| V-C              | 15.3 $\pm$ 5.3                                               | 12.0 $\pm$ 6.4                                                 | 0.2041  | 5.3 $\pm$ 2.0                                                | 3.3 $\pm$ 2.5                                                  | 0.0485  |
| V-L              | 8.8 $\pm$ 4.2                                                | 7.3 $\pm$ 3.6                                                  | 0.4096  | 2.8 $\pm$ 1.1                                                | 2.3 $\pm$ 0.46                                                 | 0.2085  |
| AC-G             | 27.1 $\pm$ 12.7                                              | 22.5 $\pm$ 8.3                                                 | 0.3349  | 2.1 $\pm$ 1.3                                                | 4.1 $\pm$ 6.4                                                  | 0.3312  |
| V-PSAE           | 10.1 $\pm$ 4.7                                               | 7.3 $\pm$ 4.1                                                  | 0.1466  | 3.0 $\pm$ 0.01                                               | 3.0 $\pm$ 0.01                                                 | 0.4496  |
| V-PSAW           | 6.8 $\pm$ 3.4                                                | 5.5 $\pm$ 3.8                                                  | 0.4032  | 3.0 $\pm$ 0.03                                               | 3.0 $\pm$ 0.04                                                 | 0.7949  |
| CO               |                                                              |                                                                |         | O <sub>3</sub>                                               |                                                                |         |
| Station code     | Lockdown II (March 30 <sup>th</sup> -April 9 <sup>th</sup> ) | Lockdown III (April 10 <sup>th</sup> -April 20 <sup>th</sup> ) | p-value | Lockdown II (March 30 <sup>th</sup> -April 9 <sup>th</sup> ) | Lockdown III (April 10 <sup>th</sup> -April 20 <sup>th</sup> ) | p-value |
| AC-T             | 0.32 $\pm$ 0.07                                              | 0.18 $\pm$ 0.08                                                | 0.0002  | 77.1 $\pm$ 16.9                                              | 79.2 $\pm$ 6.6                                                 | 0.7075  |
| AC-L             | –a                                                           | –a                                                             |         | 78.3 $\pm$ 14.7                                              | 78.1 $\pm$ 7.7                                                 | 0.9715  |
| V-C              | 0.11 $\pm$ 0.01                                              | 0.10 $\pm$ 0.01                                                | 0.1669  | 69.6 $\pm$ 15.4                                              | 72.3 $\pm$ 8.1                                                 | 0.6230  |
| V-L              | 0.15 $\pm$ 0.06                                              | 0.13 $\pm$ 0.04                                                | 0.2752  | 64.7 $\pm$ 18.4                                              | 64.3 $\pm$ 8.6                                                 | 0.9539  |
| AC-G             | –a                                                           | –a                                                             |         | –a                                                           | –a                                                             |         |
| V-PSAE           | –a                                                           | –a                                                             |         | –a                                                           | –a                                                             |         |
| V-PSAW           | –a                                                           | –a                                                             |         | 73.3 $\pm$ 13.0                                              | 76.7 $\pm$ 7.6                                                 | 0.4582  |
| PM <sub>10</sub> |                                                              |                                                                |         | PM <sub>2.5</sub>                                            |                                                                |         |

| Station code              | Lockdown II (March 30 <sup>th</sup> -April 9 <sup>th</sup> ) | Lockdown III (April 10 <sup>th</sup> -April 20 <sup>th</sup> ) | p-value                              | Lockdown II (March 30 <sup>th</sup> -April 9 <sup>th</sup> ) | Lockdown III (April 10 <sup>th</sup> -April 20 <sup>th</sup> ) | p-value |
|---------------------------|--------------------------------------------------------------|----------------------------------------------------------------|--------------------------------------|--------------------------------------------------------------|----------------------------------------------------------------|---------|
| AC-T                      | 32.6±12.5                                                    | 25.2±13.2                                                      | 0.1919                               | 12.8±3.9                                                     | 8.2±4.0                                                        | 0.0135  |
| AC-L                      | 16.2±7.4                                                     | 10.0±3.3                                                       | 0.0242                               | –a                                                           | –a                                                             |         |
| V-C                       | 12.9±3.5                                                     | 10.5±3.1                                                       | 0.1070                               | 7.0±2.4                                                      | 5.3±2.0                                                        | 0.0845  |
| V-L                       | 13.8±4.0                                                     | 12.1±3.1                                                       | 0.2801                               | –a                                                           | –a                                                             |         |
| AC-G                      | 14.6±3.8                                                     | 9.7±3.5                                                        | 0.0052                               | 8.9±2.1                                                      | 6.8±2.1                                                        | 0.0253  |
| V-PSAE                    | –a                                                           | –a                                                             |                                      | 8.2±2.5                                                      | 6.8±1.1                                                        | 0.1144  |
| V-PSAW                    | 15.1±4.9                                                     | 12.3±3.3                                                       | 0.1288                               | –a                                                           | –a                                                             |         |
| eBC <sub>T</sub>          |                                                              |                                                                | eBC <sub>F</sub>                     |                                                              |                                                                |         |
| Station code              | Lockdown II (March 30 <sup>th</sup> -April 9 <sup>th</sup> ) | Lockdown III (April 10 <sup>th</sup> -April 20 <sup>th</sup> ) | p-value                              | Lockdown II (March 30 <sup>th</sup> -April 9 <sup>th</sup> ) | Lockdown III (April 10 <sup>th</sup> -April 20 <sup>th</sup> ) | p-value |
| AC-T                      | –a                                                           | –a                                                             |                                      | –a                                                           | –a                                                             |         |
| AC-L                      | 0.40±0.19                                                    | 0.31±0.14                                                      | 0.2156                               | 0.20±0.12                                                    | 0.15±0.09                                                      | 0.2747  |
| V-C                       | 0.65±0.25                                                    | 0.55±0.31                                                      | 0.4237                               | 0.40±0.19                                                    | 0.37±0.23                                                      | 0.7268  |
| V-L                       | –a                                                           | –a                                                             |                                      | –a                                                           | –a                                                             |         |
| AC-G                      | –a                                                           | –a                                                             |                                      | –a                                                           | –a                                                             |         |
| V-PSAE                    | –a                                                           | –a                                                             |                                      | –a                                                           | –a                                                             |         |
| V-PSAW                    | –a                                                           | –a                                                             |                                      | –a                                                           | –a                                                             |         |
| eBC <sub>B</sub>          |                                                              |                                                                |                                      |                                                              |                                                                |         |
| Station Code              | Lockdown II (March 30th-April 9th)                           |                                                                | Lockdown III (April 10th-April 20th) |                                                              | p-value                                                        |         |
| AC-T                      | –a                                                           |                                                                | –a                                   |                                                              |                                                                |         |
| AC-L                      | 0.26±0.12                                                    |                                                                | 0.21±0.13                            |                                                              | 0.3188                                                         |         |
| V-C                       | 0.32±0.15                                                    |                                                                | 0.24±0.13                            |                                                              | 0.1748                                                         |         |
| V-L                       | –a                                                           |                                                                | –a                                   |                                                              |                                                                |         |
| AC-G                      | –a                                                           |                                                                | –a                                   |                                                              |                                                                |         |
| V-PSAE                    | –a                                                           |                                                                | –a                                   |                                                              |                                                                |         |
| V-PSAW                    | –a                                                           |                                                                | –a                                   |                                                              |                                                                |         |
| –a Pollutant not measured |                                                              |                                                                |                                      |                                                              |                                                                |         |

**Table S4.** Pearson's correlations of NO<sub>x</sub>, SO<sub>2</sub>, CO, O<sub>3</sub>, PM<sub>10</sub>, PM<sub>2.5</sub>, and eBC concentrations with meteorological parameters (wind speed, rainfall and solar radiation) at studied stations. Significant correlations at  $p < 0.05$  are in italic.

|                           | AC-T             | AC-L             | V-C              | V-L              | AC-G             | V-PSAE           | V-PSAW           |
|---------------------------|------------------|------------------|------------------|------------------|------------------|------------------|------------------|
| <i>Wind Speed</i>         |                  |                  |                  |                  |                  |                  |                  |
| NO <sub>x</sub>           | -0.3352 (0.0052) | -0.2206 (0.0707) | -0.3698 (0.0070) | -0.3968 (0.0007) | -0.2753 (0.0231) | -0.3892 (0.0009) | -0.3942 (0.0007) |
| SO <sub>2</sub>           | -0.3154 (0.0088) | 0.0339 (0.4296)  | -0.1585 (0.1901) | 0.0705 (0.5617)  | 0.5195 (0.0000)  | 0.0929 (0.4411)  | -0.2672 (0.0253) |
| CO                        | 0.0072 (0.9253)  | -a               | -0.1055 (0.3995) | -0.0699 (0.5733) | -a               | -a               | -a               |
| O <sub>3</sub>            | 0.1431 (0.2338)  | 0.2983 (0.0115)  | -a               | -a               | -a               | -a               | 0.0480 (0.7019)  |
| PM <sub>10</sub>          | 0.2166 (0.0670)  | 0.2133 (0.0720)  | -0.2055 (0.0878) | -0.2097 (0.0815) | 0.2273 (0.0548)  | -a               | -0.2633 (0.0276) |
| PM <sub>2.5</sub>         | 0.1656 (0.1805)  | -a               | -0.3558 (0.0019) | -a               | 0.0097 (0.9381)  | -0.3925 (0.0005) | -a               |
| eBC                       | -a               | -0.2751 (0.0203) | -0.3953 (0.0005) | -a               | -a               | -a               | -a               |
| <i>Rainfall</i>           |                  |                  |                  |                  |                  |                  |                  |
| NO <sub>x</sub>           | -0.2077 (0.0273) | -0.2931 (0.0153) | -0.3585 (0.0023) | -0.2459 (0.0402) | -0.2637 (0.0298) | -0.3051 (0.0102) | 0.3097 (0.0091)  |
| SO <sub>2</sub>           | 0.0276 (0.8231)  | -0.1401 (0.2543) | -0.1170 (0.0271) | 0.0259 (0.8317)  | 0.3149 (0.0089)  | 0.1726 (0.1532)  | -0.2612 (0.0271) |
| CO                        | -0.0725 (0.5511) | -a               | -0.1952 (0.1134) | -0.1050 (0.3979) | -a               | -a               | -a               |
| O <sub>3</sub>            | -0.0121 (0.9203) | -0.0022 (0.9856) | 0.0873 (0.4358)  | 0.0812 (0.5167)  | -a               | -a               | 0.0567 (0.6510)  |
| PM <sub>10</sub>          | -0.0986 (0.4273) | -0.0744 (0.5994) | -0.1582 (0.1910) | -0.1631 (0.1774) | -0.1125 (0.3646) | -a               | -0.1938 (0.1079) |
| PM <sub>2.5</sub>         | -0.0242 (0.8461) | -a               | -0.3063 (0.0099) | -a               | -0.0818 (0.5106) | -0.3401 (0.0040) | -a               |
| eBC                       | -a               | -0.2826 (0.0178) | -0.3844 (0.0013) | -a               | -a               | -a               | -a               |
| <i>Solar radiation</i>    |                  |                  |                  |                  |                  |                  |                  |
| NO <sub>x</sub>           | 0.1288 (0.3027)  | -0.0287 (0.8192) | 0.1019 (0.4011)  | 0.0999 (0.4106)  | 0.1946 (0.1173)  | 0.1014 (0.4037)  | 0.1330 (0.2725)  |
| SO <sub>2</sub>           | -0.0218 (0.8619) | 0.0122 (0.9225)  | 0.1543 (0.2023)  | 0.1998 (0.0973)  | -0.2445 (0.0392) | -0.3794 (0.0012) | 0.3124 (0.0084)  |
| CO                        | 0.0327 (0.7914)  |                  | -0.0192 (0.8774) | 0.0666 (0.5921)  | -a               | -a               | -a               |
| O <sub>3</sub>            | 0.4467 (0.0001)  | 0.4545 (0.0001)  | 0.3310 (0.0016)  | 0.2808 (0.0224)  | -a               | -a               | 0.3555 (0.0034)  |
| PM <sub>10</sub>          | -0.0657 (0.6030) | 0.1027 (0.3929)  | 0.1719 (0.1547)  | 0.1511 (0.2117)  | 0.1046 (0.4069)  | -a               | 0.2113 (0.0791)  |
| PM <sub>2.5</sub>         | -0.0418 (0.7410) | -a               | 0.3024 (0.0110)  | -a               | 0.1791 (0.1534)  | 0.2476 (0.0387)  | -a               |
| eBC                       | -a               | 0.2048 (0.0940)  | 0.1193 (0.3363)  | -a               | -a               | -a               | -a               |
| -a Pollutant not measured |                  |                  |                  |                  |                  |                  |                  |

**Figure S1.** Localization of A Coruña and Vigo cities air quality monitoring stations in Spain. Source: Google Maps (satellite maps, without annotations) and Mapchart.net (<https://mapchart.net/spain.html>).

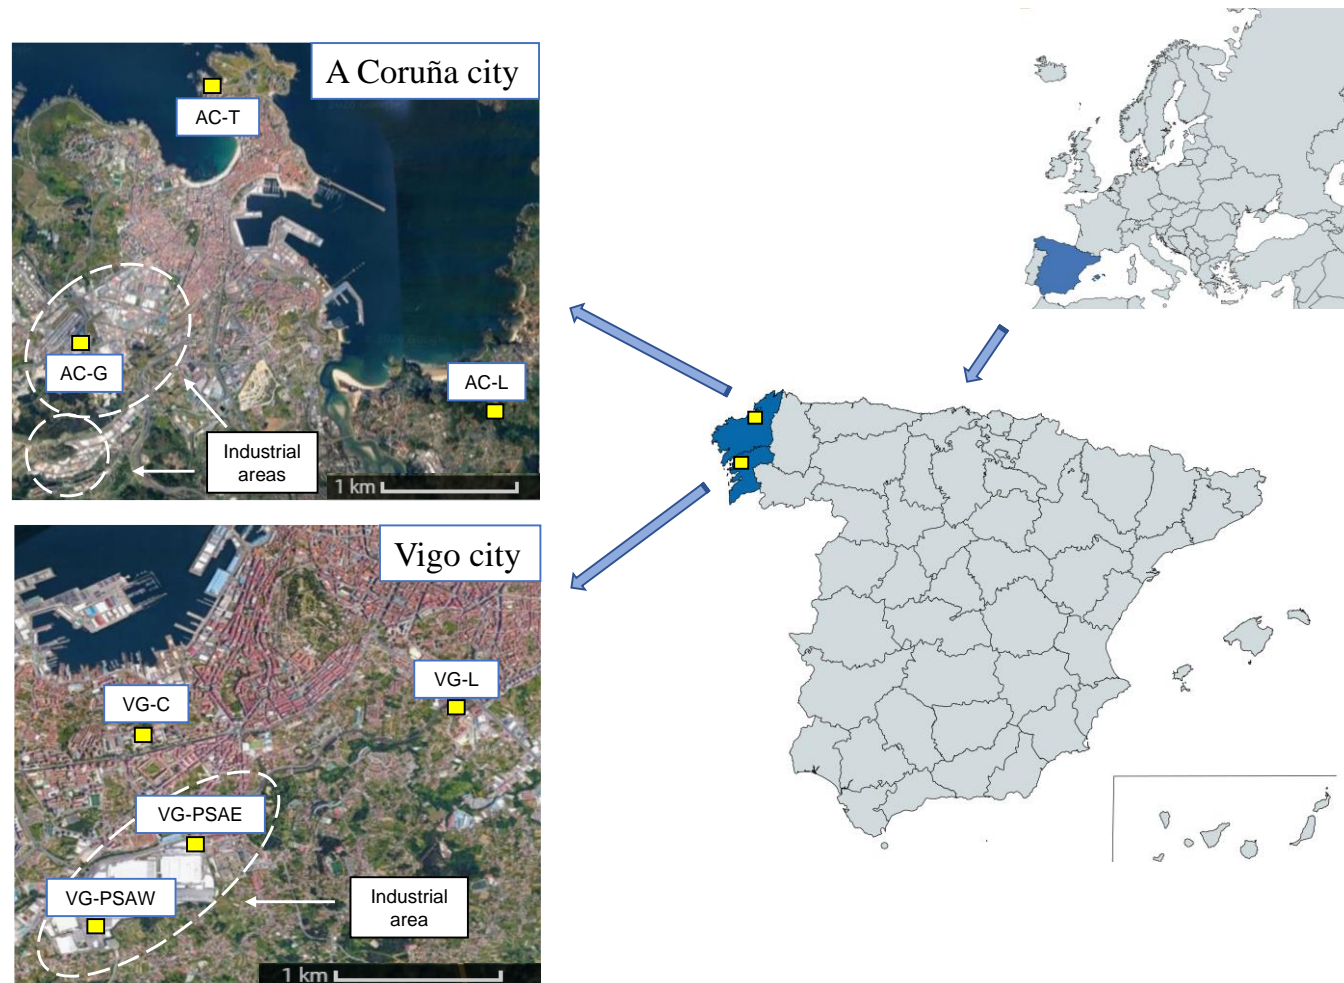



**Figure S2.** Daily mean values of meteorological conditions at A Coruña and Vigo cities, without smoothing. Highlighted gray and yellow shadows show days with biomass combustion and Saharan dust intrusion, respectively. Time periods of lockdown stages (I, II and III) are also delimited by vertical black lines.

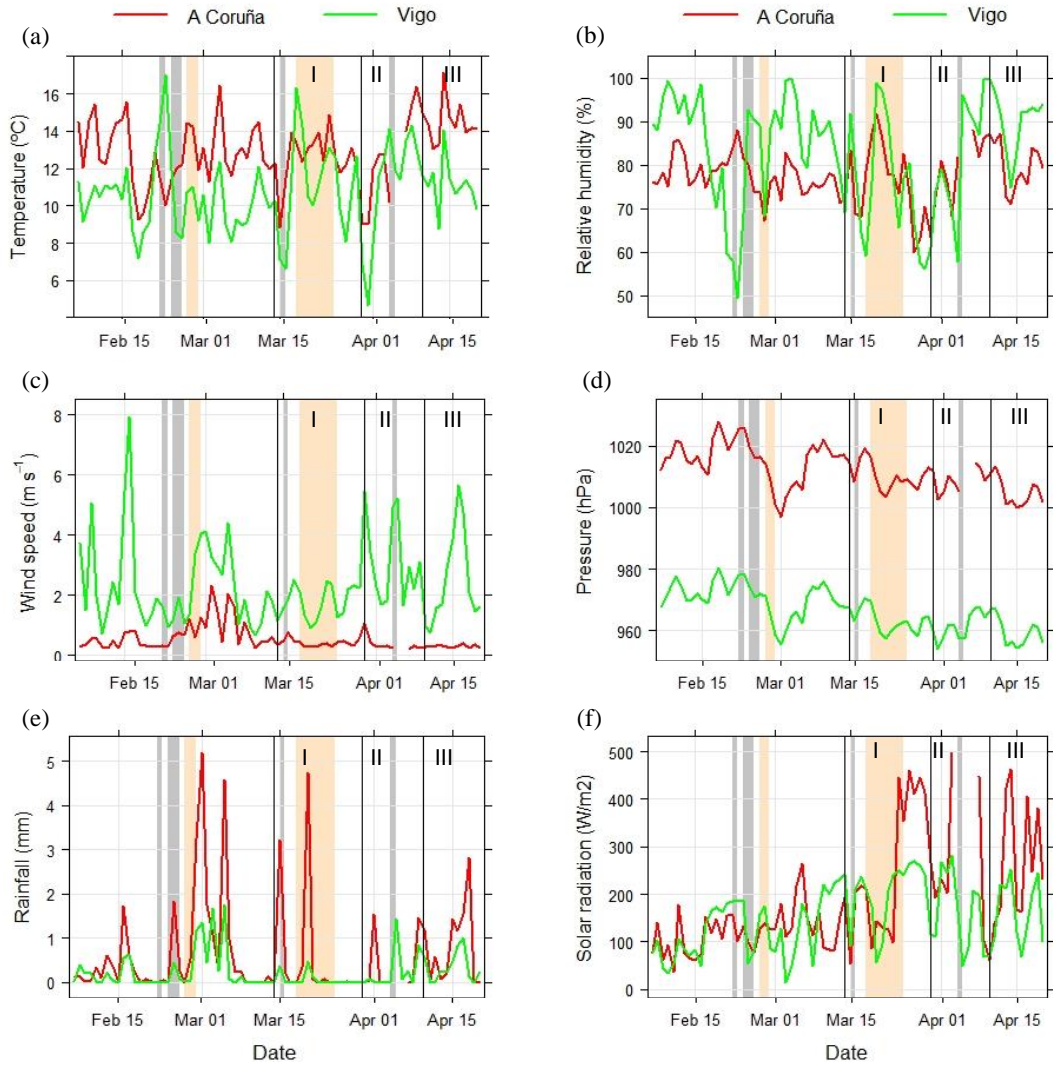

**Figure S3.** Air mass origin during pre-lockdown period (February 7<sup>th</sup> – March 13<sup>th</sup>) and lockdown period (March 14<sup>th</sup> – April 20<sup>th</sup>). *NA* North Atlantic, *NWA* Northwest Atlantic, *SWA* Southwest Atlantic, *WA* West Atlantic, *EU* Europe, *MED* Mediterranean, *NAF* North Africa, *RE* regional.

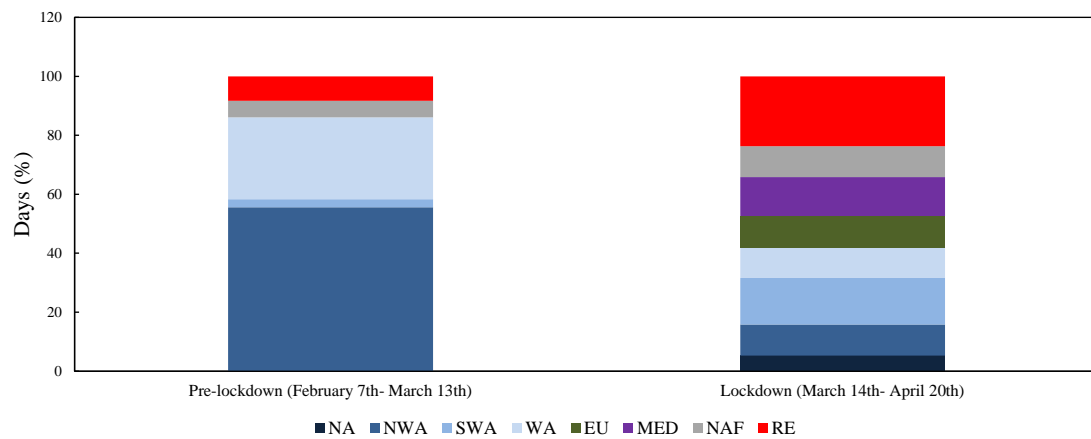

**Figure S4.** Wind roses for pre-lockdown period (February 7<sup>th</sup> – March 13<sup>th</sup>) and lockdown I-III period (March 14<sup>th</sup> – April 20<sup>th</sup>). The plots show the proportion of time that the wind is from a certain angle and wind speed range.

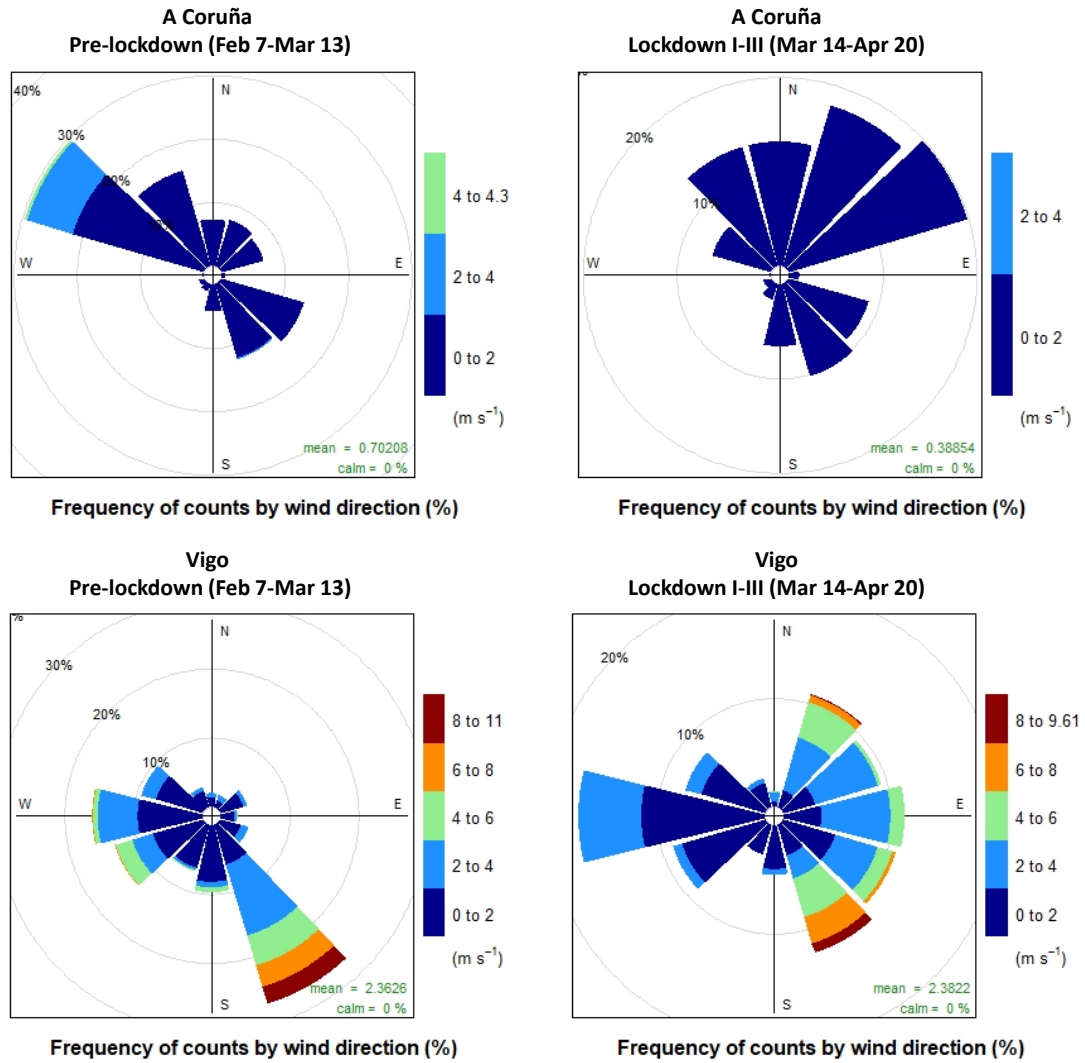

**Figure S5.** Concentration evolution of NO (a-b) and NO<sub>2</sub> (c-d) (24 h mean) before and during the lockdown period. The left and right panels correspond with data obtained for air quality monitoring stations of A Coruña and Vigo cities, respectively. Time periods of lockdown stages (I, II and III) are also delimited by vertical black lines.

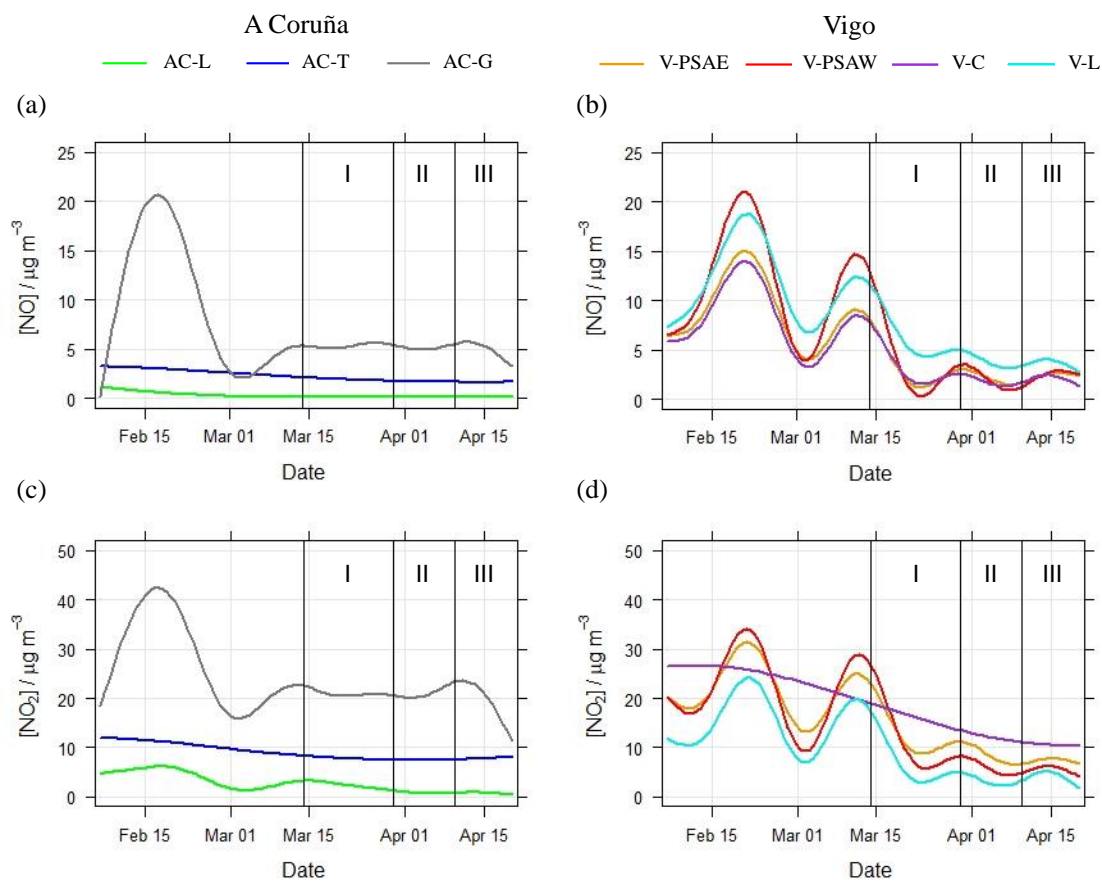

**Figure S6.** Concentration evolution of NO<sub>x</sub> and O<sub>3</sub> concentrations ( $\mu\text{g m}^{-3}$ ), temperature and relative humidity (smoothed hourly data), before and during the lockdown period at air quality monitoring stations of A Coruña and Vigo cities. Highlighted gray and yellow shadows show days with biomass combustion and Saharan dust intrusion, respectively. Time periods of lockdown stages (I, II and III) are also delimited by vertical black lines.

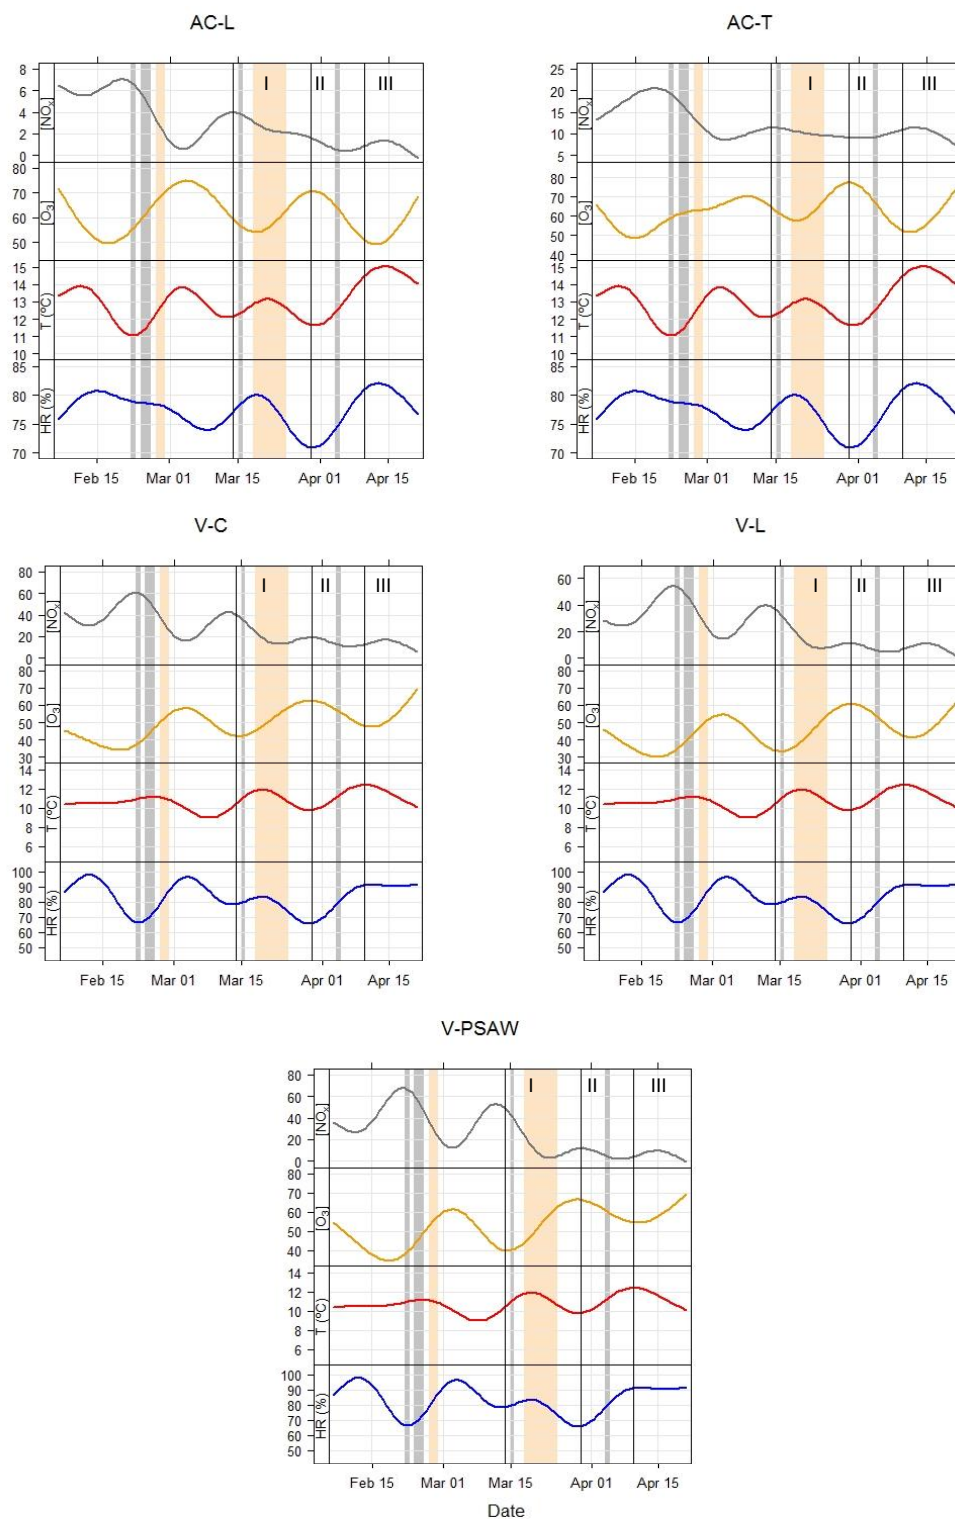

Supplement: s1 [file s1]
